# Supplementary material
Source: publisher figshare collection journal article supplement (https://frontiersin.figshare.com/ndownloader/files/31711943)
Supplement: Supplementary file [file 31711943]

## Appendix

| S No | Application name                         | Platform | Last update       | Category     | Sub-category/Focus      | No.of. Ratings | Average Rating | Persuasive Strategies                                                                                                 | Total PSD Strategies |
|------|------------------------------------------|----------|-------------------|--------------|-------------------------|----------------|----------------|-----------------------------------------------------------------------------------------------------------------------|----------------------|
| 1    | 1 Million Women                          | iOS      | Nov 13, 2019      | Lifestyle    | Personal tracking       | 10             | 4.8            | Reduction, Tailoring, Personalization, Praise, Reminders, Expertise, Real-world feel                                  | 7                    |
| 2    | Bay Disposal                             | Android  | November 25, 2016 | Business     | Waste collection        | 0              | 0              | Expertise, Real-world feel, Authority                                                                                 | 3                    |
| 3    | Bee2a Waste recycling technology         | Android  | November 23, 2017 | Business     | Regional waste disposal | 16             | 4.5            | Surface credibility, Real-world feel                                                                                  | 2                    |
| 4    | Benton County Waste Management           | Android  | August 1, 2019    | Productivity | Regional waste disposal | 0              | 0              | Praise                                                                                                                | 1                    |
| 5    | Best Before - Food Tracker               | Android  | November 2, 2017  | Food & Drink | Food WM                 | 188            | 4.1            | Expertise, Surface credibility, Third-party endorsements                                                              | 3                    |
| 6    | Big Dumpster                             | Android  | January 23, 2019  | Business     | Commercial WM           | 29             | 4.2            | Reduction, Personalization, Surface credibility, Real-world feel, Authority, Normative influence, Social facilitation | 8                    |
| 7    | BIN IT                                   | Android  | March 9, 2019     | Education    | Regional waste disposal | 40             | 4.1            | Reduction, Tunneling, Personalization, Rewards, Trustworthiness, Surface credibility, Real-world feel                 | 8                    |
| 8    | Bin The Trash: Recycling Game            | Android  | June 3, 2018      | Casual       | Game                    | 15             | 4.7            | Reduction, Tailoring, Personalization, Reminders, Surface credibility, Real-world feel                                | 6                    |
| 9    | Biomedical Waste Management Learning App | Android  | March 27, 2018    | Education    | Biomedical WM           | 56             | 4.7            |                                                                                                                       | 0                    |
| 10   | Bukkawaste                               | iOS      | Sep 24, 2019      | Productivity | Waste collection        | 7              | 4.4            | Personalization                                                                                                       | 1                    |
| 11   | Calgary Garbage Day                      | Android  | August 1, 2019    | Productivity | Regional waste disposal | 3250           | 4.7            | Expertise, Surface credibility                                                                                        | 2                    |
| 12   | City of Bunbury My 3 Bins                | iOS      |                   | Utilities    | Regional waste disposal | 0              | 0              | Rewards, Reminders, Liking, Real-world feel, Social facilitation                                                      | 5                    |
| 13   | City of Hamilton                         | Android  | July 18, 2019     | Social       | Regional waste disposal | 12             | 4.1            | Personalization, Rewards, Authority                                                                                   | 3                    |

|    |                                |         |                    |              |                         |      |     |                                                                                                                                   |    |
|----|--------------------------------|---------|--------------------|--------------|-------------------------|------|-----|-----------------------------------------------------------------------------------------------------------------------------------|----|
| 14 | City of Peterborough Waste     | Android | August 1, 2019     | Productivity | Regional waste disposal | 46   | 4.5 | Reduction, Tailoring, Personalization, Rehearsal, Praise, Rewards, Reminders, Surface credibility, Real-world feel, Verifiability | 10 |
| 15 | City of St Albert: BeWasteWise | Android | August 1, 2019     | Productivity | Regional waste disposal | 108  | 4.8 | Reduction, Tailoring, Personalization, Reminders, Surface credibility, Real-world feel, Verifiability                             | 7  |
| 16 | Clean India - Recycle Waste    | Android | June 15, 2015      | Education    | Game                    | 44   | 4.5 | Simulation, Praise, Suggestion, Liking, Surface credibility, Real-world feel                                                      | 6  |
| 17 | Coffs Waste Conference         | Android | April 18, 2019     | Events       | Conference              | 0    | 0   | Reduction, Tailoring, Personalization, Rehearsal, Praise, Rewards, Reminders, Surface credibility, Real-world feel, Verifiability | 10 |
| 18 | CoGo - Connecting Good         | iOS     | Nov 15, 2019       | Lifestyle    | Personal tracking       | 36   | 3.6 | Reduction, Tunneling, Personalization, Trustworthiness, Surface credibility, Real-world feel, Social facilitation                 | 8  |
| 19 | Colchester Waste Management    | Android | August 1, 2019     | Productivity | Regional waste disposal | 142  | 4.7 | Reduction, Tailoring, Personalization, Reminders, Surface credibility, Real-world feel, Verifiability                             | 7  |
| 20 | Commurban                      | Android | September 30, 2019 | Social       | DIY projects            | 5    | 5   | Reduction, Tailoring, Personalization, Reminders, Surface credibility, Real-world feel, Authority, Verifiability                  | 8  |
| 21 | Covanta Games                  | iOS     | Jun 13, 2018       | Games        | Game                    | 12   | 4.8 | Reduction, Personalization, Liking, Expertise, Surface credibility, Real-world feel, Authority                                    | 7  |
| 22 | CozZo . Food Inventory Manager | iOS     | Sep 1, 2019        | Food & Drink | Food WM                 | 12   | 4   | Reduction, Tailoring, Personalization, Rehearsal, Praise, Rewards, Reminders, Surface credibility, Real-world feel, Verifiability | 10 |
| 23 | CUI Curbside Collection        | Android | August 1, 2019     | Productivity | Regional waste disposal | 27   | 4.3 | Tailoring                                                                                                                         | 1  |
| 24 | Cumberland County Solid Waste  | Android | August 1, 2019     | Productivity | Regional waste disposal | 125  | 4.4 | Reduction, Tailoring, Personalization, Rehearsal, Praise, Rewards, Reminders, Surface credibility, Real-world feel, Verifiability | 10 |
| 25 | Cycled                         | Android | February 27, 2019  | Social       | Marketplace             | 13   | 4.6 | Surface credibility                                                                                                               | 1  |
| 26 | Don't Waste Waste              | Android | September 29, 2018 | House & Home | Regional waste disposal | 7    | 4.1 | Reminders, Authority, Verifiability                                                                                               | 3  |
| 27 | Dumpsters on Demand - RRO      | iOS     | Mar 23, 2018       | Business     | Commercial WM           | 2    | 5   | Tailoring, Personalization, Rehearsal, Praise, Rewards, Reminders, Surface credibility, Real-world feel, Verifiability            | 9  |
| 28 | Durham Region Waste            | Android | August 1, 2019     | Productivity | Regional waste disposal | 2902 | 4.7 | Personalization, Rehearsal                                                                                                        | 3  |

|    |                                                  |         |                   |                   |                         |     |     |                                                                                                                                |    |
|----|--------------------------------------------------|---------|-------------------|-------------------|-------------------------|-----|-----|--------------------------------------------------------------------------------------------------------------------------------|----|
| 29 | Eastern NS Waste Info                            | Android | August 1, 2019    | Productivity      | Regional waste disposal | 62  | 4.9 | Reduction, Tailoring, Personalization, Reminders, Surface credibility, Real-world feel, Verifiability                          | 7  |
| 30 | EasyWaste                                        | Android | October 3, 2019   | Business          | Marketplace             | 5   | 5   | Reduction, Rewards, Trustworthiness, Surface credibility, Real-world feel, Social facilitation                                 | 6  |
| 31 | Eco360                                           | Android | July 31, 2019     | Productivity      | Regional waste disposal | 730 | 4.9 | Reduction, Reminders, Surface credibility, Real-world feel, Verifiability                                                      | 5  |
| 32 | ECS e-Waste                                      | Android | July 5, 2017      | Business          | Marketplace             | 49  | 4.1 | Reduction, Tailoring, Personalization, Reminders, Surface credibility, Real-world feel, Verifiability                          | 7  |
| 33 | Edmonton Waste Wise                              | Android | August 1, 2019    | Productivity      | Regional waste disposal | 296 | 4.5 | Reduction                                                                                                                      | 2  |
| 34 | eevie - Eco Habit Tracker                        | iOS     | Nov 4, 2019       | Lifestyle         | Personal tracking       | 4   | 3.3 | Reduction, Personalization, Reminders, Real-world feel, Verifiability                                                          | 5  |
| 35 | Emralscleanup game                               | iOS     | May 2, 2019       | Lifestyle         | Game                    | 4   | 4   | Surface credibility, Real-world feel, Social facilitation                                                                      | 3  |
| 36 | Enviourenmental Studies Complete Guide (OFFLINE) | Android | October 13, 2017  | Education         | Education               | 103 | 4.6 | Reduction, Tailoring, Reminders, Surface credibility, Real-world feel, Verifiability                                           | 6  |
| 37 | Environment Challenge                            | Android | November 1, 2019  | Lifestyle         | Personal tracking       | 406 | 4.6 | Reduction, Tailoring, Reminders, Surface credibility, Real-world feel, Verifiability                                           | 6  |
| 38 | ENVIRONMENT PROTECTION CORPORATION               | Android | August 11, 2019   | Maps & Navigation | Biomedical WM           | 0   | 0   | Personalization                                                                                                                | 1  |
| 39 | Environmental Engineering                        | Android | April 11, 2019    | Education         | Education               | 8   | 2.5 | Reduction                                                                                                                      | 1  |
| 40 | Environmental Engineering                        | Android | September 6, 2019 | Education         | Education               | 6   | 4.3 | Simulation, Rewards, Liking, Social facilitation                                                                               | 4  |
| 41 | Environmental Engineering 1                      | Android | April 24, 2019    | Education         | Education               | 151 | 4.1 | Reduction, Tailoring, Personalization, Rehearsal, Praise, Rewards, Reminders, Surface credibility, Real-world feel             | 9  |
| 42 | Environmental Engineering I                      | Android | January 9, 2018   | Education         | Education               | 129 | 4.2 | Reduction, Tailoring, Personalization, Reminders, Surface credibility, Real-world feel                                         | 6  |
| 43 | ENVIRONMENTAL ENGINEERING Quiz EXAM              | Android | July 23, 2018     | Education         | Education               | 0   | 0   | Reduction, Tailoring, Personalization, Rehearsal, Praise, Rewards, Reminders, Suggestion, Surface credibility, Real-world feel | 10 |
| 44 | Environmental Science and Engineering            | Android | March 12, 2018    | Books & Reference | Education               | 33  | 4.4 | Reduction, Personalization, Social facilitation                                                                                | 3  |
| 45 | Environmental Studies                            | Android | March 29, 2019    | Education         | Education               | 10  | 4.1 | Surface credibility, Real-world feel                                                                                           | 3  |
| 46 | ENVIRONMENTAL STUDIES NOTES                      | Android | June 9, 2018      | Education         | Education               | 51  | 4.1 | Suggestion                                                                                                                     | 1  |

|    |                                                 |         |                  |              |                         |      |     |                                                                                                                                               |    |
|----|-------------------------------------------------|---------|------------------|--------------|-------------------------|------|-----|-----------------------------------------------------------------------------------------------------------------------------------------------|----|
| 47 | Environmental Studies- Complete Reference Guide | Android | October 3, 2018  | Education    | Education               | 6    | 4.2 | Reduction, Tailoring, Personalization, Rehearsal, Praise, Rewards, Reminders, Suggestion, Surface credibility, Real-world feel                | 10 |
| 48 | ERA - Electronic Recycling                      | Android | August 13, 2014  | Business     | Waste collection        | 9    | 4.6 | Reduction, Tailoring, Surface credibility, Real-world feel                                                                                    | 4  |
| 49 | Eswap                                           | Android | April 15, 2018   | Business     | Commercial WM           | 5    | 5   | Reduction, Tailoring, Personalization, Reminders, Suggestion, Surface credibility, Real-world feel, Verifiability                             | 8  |
| 50 | FoodHero - Fight Food Waste & Save Money        | Android | October 2, 2019  | Food & Drink | Food WM                 | 156  | 4   | Reduction, Tunneling, Personalization, Praise, Reminders, Suggestion, Liking, Social facilitation                                             | 9  |
| 51 | FoodLess - Food Expiration Tracker              | Android | November 4, 2019 | Food & Drink | Food WM                 | 12   | 4.4 | Reduction, Tailoring, Personalization, Rehearsal, Praise, Rewards, Reminders, Suggestion, Surface credibility, Real-world feel, Verifiability | 11 |
| 52 | Foodprint                                       | iOS     | Sep 25, 2019     | Food & Drink | Food WM                 | 35   | 4.2 | Reduction, Reminders, Real-world feel, Social facilitation                                                                                    | 4  |
| 53 | Foodro                                          | iOS     | Feb 13, 2019     | Food & Drink | Food WM                 | 0    | 0   | Personalization, Simulation, Rewards, Liking, Social role                                                                                     | 6  |
| 54 | Fort Worth Garbage & Recycling                  | Android | August 1, 2019   | Productivity | Regional waste disposal | 715  | 4.8 | Reduction, Tailoring, Personalization, Reminders, Surface credibility, Real-world feel, Verifiability                                         | 7  |
| 55 | FreezerManager                                  | iOS     | Oct 9, 2019      | Lifestyle    | Regional waste disposal | 0    | 0   |                                                                                                                                               | 0  |
| 56 | Fridge Hero - Food Tracking                     | iOS     | Aug 26, 2019     | Food & Drink | Food WM                 | 6    | 4.8 | Real-world feel, Social facilitation                                                                                                          | 2  |
| 57 | Fridgely                                        | iOS     | May 16, 2019     | Food & Drink | Food WM                 | 74   | 4.1 | Reduction, Tailoring, Personalization, Reminders, Suggestion, Surface credibility, Real-world feel                                            | 7  |
| 58 | Garbage and Recycling Day                       | Android | July 31, 2019    | Productivity | Regional waste disposal | 491  | 4.8 | Surface credibility                                                                                                                           | 1  |
| 59 | Geev: The Zero Waste Solution                   | Android | November 4, 2019 | Lifestyle    | Food WM                 | 8535 | 4.6 | Surface credibility                                                                                                                           | 1  |
| 60 | Gibsons Waste Collection                        | Android | August 1, 2019   | Productivity | Regional waste disposal | 5    | 5   | Personalization, Surface credibility, Social facilitation                                                                                     | 3  |
| 61 | Go Green Challenge                              | Android | June 14, 2019    | Lifestyle    | Personal tracking       | 77   | 4.2 | Personalization, Praise, Rewards                                                                                                              | 3  |
| 62 | Googreens                                       | iOS     |                  | Lifestyle    | Marketplace             | 0    | 0   | Tunneling, Personalization, Praise, Reminders, Liking, Normative influence, Social facilitation                                               | 8  |
| 63 | Halifax Recycles                                | Android | August 1, 2019   | Productivity | Regional waste disposal | 2717 | 4.6 | Reduction, Tailoring, Personalization, Reminders, Trustworthiness, Surface credibility, Real-world feel, Normative influence                  | 8  |

|    |                                             |         |                    |                   |                         |      |     |                                                                                                                                   |    |
|----|---------------------------------------------|---------|--------------------|-------------------|-------------------------|------|-----|-----------------------------------------------------------------------------------------------------------------------------------|----|
| 64 | HCF Bio Medical Waste                       | Android | May 8, 2019        | Business          | Biomedical WM           | 15   | 4.7 | Rehearsal, Rewards, Suggestion, Surface credibility, Social comparison, Social facilitation                                       | 6  |
| 65 | Info on Environmental Protection Act 1990   | Android | March 22, 2019     | Books & Reference | Education               | 0    | 0   | Reduction, Personalization, Reminders, Real-world feel, Social facilitation                                                       | 7  |
| 66 | InstaFresh                                  | iOS     | Nov 6, 2019        | Food & Drink      | Food WM                 | 2    | 3   | Reminders, Surface credibility, Real-world feel, Social facilitation                                                              | 4  |
| 67 | IVRI- Waste Management Guide App            | Android | May 28, 2019       | Education         | Education               | 63   | 5   | Reduction, Trustworthiness, Real-world feel                                                                                       | 3  |
| 68 | JK Medical Waste Management System          | Android | August 11, 2019    | Maps & Navigation | Biomedical WM           | 1    | 1   | Personalization, Surface credibility, Social facilitation                                                                         | 3  |
| 69 | KONET                                       | Android | July 5, 2019       | Business          | Commercial WM           | 0    | 0   | Reduction, Rewards, Reminders, Real-world feel, Verifiability                                                                     | 6  |
| 70 | Lagos Waste Management Authority            | Android | August 3, 2019     | Lifestyle         | Regional waste disposal | 3    | 4.7 | Personalization, Trustworthiness, Surface credibility, Real-world feel                                                            | 4  |
| 71 | Marck Waste                                 | iOS     | Sep 18, 2019       | Business          | Commercial WM           | 0    | 0   | Reduction, Tailoring, Personalization, Rehearsal, Praise, Rewards, Reminders, Surface credibility, Real-world feel, Verifiability | 10 |
| 72 | Moirra Shire Waste Info                     | Android | September 30, 2019 | Tools             | Regional waste disposal | 5    | 4.1 | Tunneling, Personalization, Suggestion, Real-world feel, Social facilitation                                                      | 5  |
| 73 | Mr.Fill Waste Manager                       | iOS     | Oct 10, 2019       | Utilities         | Commercial WM           | 0    | 0   | Reduction, Real-world feel, Verifiability                                                                                         | 3  |
| 74 | Murreys Disposal                            | Android | August 1, 2019     | Productivity      | Regional waste disposal | 172  | 4.8 | Reduction, Trustworthiness, Real-world feel                                                                                       | 3  |
| 75 | My City Cleaning - Waste Recycle Management | Android | October 26, 2018   | Education         | Game                    | 124  | 3.9 | Surface credibility, Social facilitation                                                                                          | 2  |
| 76 | My Little Plastic Footprint                 | iOS     | Oct 1, 2019        | Education         | Plastic WM              | 2    | 4.5 | Reduction, Real-world feel                                                                                                        | 2  |
| 77 | My Waste                                    | Android | May 15, 2019       | Productivity      | Regional waste disposal | 5475 | 4.2 | Reduction, Personalization, Reminders, Surface credibility, Real-world feel, Authority                                            | 6  |
| 78 | MyACETTrashMN                               | iOS     |                    | Reference         | Regional waste disposal | 29   | 4.8 | Reduction, Trustworthiness, Expertise, Real-world feel, Verifiability                                                             | 5  |
| 79 | NoWaste - Food Inventory List               | iOS     | Sep 10, 2019       | Food & Drink      | Food WM                 | 100  | 4.3 | Reduction                                                                                                                         | 1  |
| 80 | Ocean's Zero                                | Android | April 12, 2019     | Lifestyle         | Personal tracking       | 204  | 4.1 | Reduction, Personalization                                                                                                        | 2  |
| 81 | OLIO - Share more. Waste less.              | Android | October 23, 2019   | Food & Drink      | Food WM                 | 3027 | 3.5 | Personalization, Reminders, Real-world feel                                                                                       | 4  |

|    |                                                |         |                   |               |                         |        |     |                                                                                                                                      |    |
|----|------------------------------------------------|---------|-------------------|---------------|-------------------------|--------|-----|--------------------------------------------------------------------------------------------------------------------------------------|----|
| 82 | OneHalton                                      | Android | November 8, 2018  | Social        | Regional waste disposal | 29     | 2.8 | Reduction, Tailoring, Reminders                                                                                                      | 4  |
| 83 | Ottawa Collection Calendar                     | Android | August 1, 2019    | Productivity  | Regional waste disposal | 2688   | 4.8 | Reduction, Personalization, Reminders, Surface credibility, Real-world feel                                                          | 5  |
| 84 | Oxford County Wasteline                        | Android | August 1, 2019    | Productivity  | Regional waste disposal | 285    | 4.7 | Tunneling, Personalization, Suggestion, Real-world feel, Social facilitation                                                         | 5  |
| 85 | Peel Garbage Collection                        | Android | December 14, 2017 | House & Home  | Regional waste disposal | 16     | 4.2 | Reduction, Surface credibility                                                                                                       | 2  |
| 86 | Peovica                                        | Android | November 10, 2017 | Business      | Regional waste disposal | 7      | 4.5 | Reduction, Tailoring, Personalization, Reminders, Surface credibility, Real-world feel                                               | 6  |
| 87 | Pick Pink                                      | iOS     | Apr 10, 2018      | Utilities     | Waste collection        | 4      | 4   | Reduction, Tailoring, Personalization, Reminders, Surface credibility                                                                | 5  |
| 88 | Plastic waste recycling projects               | Android | October 1, 2018   | Entertainment | DIY projects            | 0      | 0   | Reduction, Personalization, Reminders, Surface credibility, Real-world feel                                                          | 5  |
| 89 | Plutocalc Water and Wastewater                 | Android | September 8, 2018 | Tools         | Calculator              | 136    | 4.7 | Reduction, Tailoring, Personalization, Reminders, Liking, Trustworthiness, Surface credibility, Real-world feel, Normative influence | 10 |
| 90 | Recycle Challenge - Fast, fun and educational! | Android | July 12, 2019     | Casual        | Game                    | 5      | 4.9 | Reduction, Personalization, Reminders, Real-world feel, Authority, Third-party endorsements, Social facilitation                     | 7  |
| 91 | Recycle Run                                    | Android | June 3, 2015      | Racing        | Game                    | 35     | 4.5 | Personalization, Praise, Surface credibility, Cooperation                                                                            | 5  |
| 92 | Recycle!                                       | Android | November 16, 2018 | Lifestyle     | Regional waste disposal | 20,264 | 4.2 | Reduction, Tailoring, Personalization, Reminders, Surface credibility, Real-world feel                                               | 6  |
| 93 | Recycling                                      | Android | February 28, 2017 | Entertainment | Education               | 15     | 2.9 | Personalization, Surface credibility, Real-world feel                                                                                | 3  |
| 94 | reGAIN app                                     | iOS     | May 10, 2019      | Shopping      | Cloth WM                | 74     | 4.7 | Reduction, Rewards, Reminders, Surface credibility, Third-party endorsements, Social comparison                                      | 6  |
| 95 | Region 6 NS Recycles                           | Android | July 31, 2019     | Productivity  | Regional waste disposal | 18     | 4.8 | Tunneling, Personalization, Suggestion, Real-world feel, Social facilitation                                                         | 5  |
| 96 | RePrint Footprint Tracker                      | iOS     | Mar 19, 2019      | Lifestyle     | Personal tracking       | 20     | 4.6 | Reduction, Tailoring, Personalization, Reminders, Surface credibility, Verifiability                                                 | 6  |
| 97 | RSC 8 Solid Waste                              | Android | August 1, 2019    | Productivity  | Regional waste disposal | 69     | 4.8 | Reduction, Tunneling, Tailoring, Personalization, Social learning, Social facilitation                                               | 7  |

|     |                                                 |         |                   |              |                         |     |     |                                                                                                                                                                                               |    |
|-----|-------------------------------------------------|---------|-------------------|--------------|-------------------------|-----|-----|-----------------------------------------------------------------------------------------------------------------------------------------------------------------------------------------------|----|
| 98  | SAFETY OFFICERS BLOG                            | Android | November 6, 2017  | Education    | Education               | 32  | 4.8 | Simulation, Rehearsal, Surface credibility                                                                                                                                                    | 4  |
| 99  | Saskatoon Recycle & Waste                       | Android | August 1, 2019    | Productivity | Regional waste disposal | 405 | 4.7 | Reduction, Personalization, Simulation, Reminders, Trustworthiness, Expertise, Surface credibility, Real-world feel, Social comparison, Normative influence, Social facilitation, Cooperation | 12 |
| 100 | Scrapo - Plastic Recycling Marketplace          | Android | October 9, 2019   | Business     | Marketplace             | 170 | 3.8 | Simulation, Praise, Suggestion, Liking, Surface credibility, Real-world feel                                                                                                                  | 6  |
| 101 | Segtech Bio Waste                               | Android | July 30, 2019     | Business     | Biomedical WM           | 0   | 0   | Reduction, Personalization, Surface credibility, Real-world feel                                                                                                                              | 4  |
| 102 | Smart Plastic Recycling                         | Android | October 11, 2016  | Lifestyle    | DIY projects            | 15  | 3.8 | Personalization, Simulation, Rehearsal, Praise, Rewards, Suggestion, Liking, Surface credibility, Social comparison, Cooperation                                                              | 11 |
| 103 | Smart Trivandrum                                | Android | October 5, 2019   | Tools        | Regional waste disposal | 145 | 4.1 | Reduction, Tunneling, Suggestion                                                                                                                                                              | 4  |
| 104 | Solid Waste Management                          | Android | December 3, 2016  | Education    | Education               | 0   | 2.5 | Reduction, Personalization, Reminders, Suggestion, Expertise, Surface credibility, Real-world feel, Third-party endorsements, Verifiability, Cooperation                                      | 11 |
| 105 | Solid Waste Management                          | Android | November 14, 2018 | Social       | Regional waste disposal | 0   | 0   | Reduction, Tailoring, Personalization, Rehearsal, Praise, Rewards, Surface credibility, Real-world feel, Verifiability                                                                        | 9  |
| 106 | SOS Waste                                       | Android | January 3, 2019   | Productivity | Commercial WM           | 0   | 0   | Reduction, Reminders                                                                                                                                                                          | 3  |
| 107 | Start Recycle                                   | Android | January 4, 2019   | Business     | Commercial WM           | 18  | 4.8 | Reduction, Tailoring, Personalization, Reminders, Surface credibility, Real-world feel, Verifiability                                                                                         | 7  |
| 108 | Stay-Fresh                                      | iOS     | Jul 10, 2019      | Food & Drink | Food WM                 | 5   | 5   | Reduction, Personalization, Expertise, Surface credibility, Real-world feel                                                                                                                   | 6  |
| 109 | Surrey Rethink Waste                            | Android | August 1, 2019    | Productivity | Regional waste disposal | 634 | 4.6 | Reduction, Rehearsal, Praise, Rewards, Surface credibility, Verifiability                                                                                                                     | 6  |
| 110 | Sustainable Citizen App                         | iOS     |                   | Education    | Regional waste disposal | 0   | 0   | Reduction, Tailoring, Personalization, Reminders, Surface credibility, Real-world feel                                                                                                        | 6  |
| 111 | Tadweer                                         | iOS     | Feb 21, 2017      | Business     | Regional waste disposal | 2   | 5   | Reduction, Reminders, Real-world feel                                                                                                                                                         | 4  |
| 112 | Tadweer Recycling Game                          | iOS     | Jan 2, 2017       | Games        | Game                    | 0   | 0   | Personalization, Praise, Rewards, Authority, Cooperation                                                                                                                                      | 6  |
| 113 | TakaCycle: Free Waste Collection for Recycling. | Android | October 4, 2019   | Productivity | Regional waste disposal | 0   | 0   | Personalization, Reminders, Surface credibility, Real-world feel, Authority, Third-party endorsements                                                                                         | 6  |

|     |                                                           |         |                    |                   |                         |      |     |                                                                                                                                                                                                  |    |
|-----|-----------------------------------------------------------|---------|--------------------|-------------------|-------------------------|------|-----|--------------------------------------------------------------------------------------------------------------------------------------------------------------------------------------------------|----|
| 114 | The Environment Magazine                                  | Android | April 18, 2019     | News & Magazines  | Magazine                | 6    | 4.3 | Surface credibility                                                                                                                                                                              | 2  |
| 115 | The SmartBin App                                          | Android | January 15, 2019   | Simulation        | Game                    | 0    | 0   | Reduction, Personalization                                                                                                                                                                       | 2  |
| 116 | TOwaste                                                   | Android | April 26, 2019     | Lifestyle         | Regional waste disposal | 97   | 3.9 | Reduction, Rewards, Trustworthiness, Surface credibility, Social learning, Social comparison, Social facilitation                                                                                | 8  |
| 117 | Trash Rain                                                | Android | April 3, 2018      | Action            | Game                    | 0    | 0   | Personalization, Rewards                                                                                                                                                                         | 3  |
| 118 | Unwrapped UAE                                             | Android | September 11, 2019 | Lifestyle         | Regional waste disposal | 0    | 0   | Personalization, Reminders, Trustworthiness                                                                                                                                                      | 4  |
| 119 | USA Waste Management                                      | Android | February 8, 2019   | Business          | Commercial WM           | 0    | 0   | Personalization, Rewards                                                                                                                                                                         | 2  |
| 120 | VanCollect                                                | Android | August 1, 2019     | Productivity      | Regional waste disposal | 2029 | 4.7 | Reduction, Reminders, Surface credibility                                                                                                                                                        | 4  |
| 121 | Waste & Recycling Expo Canada                             | Android | August 23, 2019    | Productivity      | Conference              | 0    | 0   | Reduction, Personalization, Rewards, Suggestion, Surface credibility, Real-world feel                                                                                                            | 6  |
| 122 | Waste Atlas                                               | Android | February 9, 2015   | Tools             | Data collection         | 15   | 4.5 | Tailoring, Personalization, Reminders, Liking, Surface credibility, Real-world feel, Social facilitation                                                                                         | 8  |
| 123 | Waste Less                                                | Android | April 3, 2019      | Tools             | Regional waste disposal | 158  | 4.1 | Reduction, Personalization, Rewards, Reminders, Liking, Trustworthiness, Surface credibility, Real-world feel, Third-party endorsements, Social learning, Social comparison, Social facilitation | 14 |
| 124 | Waste Management                                          | Android | September 7, 2015  | Education         | Education               | 2    | 4   | Reduction, Rewards, Reminders, Suggestion, Liking, Surface credibility, Real-world feel, Social facilitation                                                                                     | 9  |
| 125 | Waste Management City Cleanup                             | iOS     | June 1, 2019       | Games             | Game                    | 0    | 0   | Reduction, Personalization, Reminders, Surface credibility, Real-world feel, Verifiability                                                                                                       | 6  |
| 126 | Waste Management Exam StudyToken                          | Android | September 30, 2019 | Education         | Education               | 0    | 0   | Reduction, Tunneling, Tailoring, Personalization, Simulation, Praise, Reminders, Suggestion, Liking, Expertise, Surface credibility, Real-world feel, Social facilitation, Cooperation           | 15 |
| 127 | Waste Management Review                                   | Android | February 10, 2019  | Books & Reference | Magazine                | 0    | 0   | Reduction, Simulation, Praise, Reminders, Suggestion, Social comparison, Social facilitation                                                                                                     | 8  |
| 128 | Waste No Food                                             | Android | February 21, 2019  | Social            | Food WM                 | 0    | 0   | Reduction                                                                                                                                                                                        | 2  |
| 129 | Waste No More - Grocery, Shopping Lists & Home Inventory! | iOS     | Feb 02, 2015       | Productivity      | Food WM                 | 0    | 0   | Reduction, Tailoring, Personalization, Reminders, Suggestion, Social facilitation                                                                                                                | 6  |
| 130 | Waste Today                                               | Android | September 9, 2019  | Business          | Magazine                | 0    | 0   | Reduction, Personalization, Reminders, Suggestion                                                                                                                                                | 5  |



|     |                                           |         |                    |              |                         |     |     |                                                                                                                                                                                                                                                                                |    |
|-----|-------------------------------------------|---------|--------------------|--------------|-------------------------|-----|-----|--------------------------------------------------------------------------------------------------------------------------------------------------------------------------------------------------------------------------------------------------------------------------------|----|
| 131 | Waste Water Engineering Exam Quiz         | Android | November 6, 2018   | Education    | Education               | 0   | 0   | Reduction, Personalization, Suggestion, Surface credibility, Third-party endorsements                                                                                                                                                                                          | 6  |
| 132 | Waste Water Engineering Test Prep 2019 Ed | Android | May 9, 2019        | Education    | Education               | 0   | 0   | Tailoring, Personalization                                                                                                                                                                                                                                                     | 3  |
| 133 | Waste Wise Greater Sudbury                | Android | August 1, 2019     | Productivity | Regional waste disposal | 57  | 4.4 | Reduction, Tunneling, Tailoring, Personalization, Simulation, Reminders, Suggestion, Liking, Trustworthiness, Expertise, Surface credibility, Real-world feel, Third-party endorsements, Verifiability, Social learning, Normative influence, Social facilitation, Cooperation | 20 |
| 134 | WasteCon 2018                             | Android | September 23, 2018 | Events       | Conference              | 0   | 0   | Reduction, Tunneling, Tailoring, Personalization, Simulation, Praise, Rewards, Reminders, Suggestion, Liking, Trustworthiness, Expertise, Real-world feel                                                                                                                      | 14 |
| 135 | WasteConnect                              | Android | August 23, 2019    | Productivity | Regional waste disposal | 126 | 4.5 | Reduction, Tailoring, Personalization, Reminders, Liking, Surface credibility, Social facilitation                                                                                                                                                                             | 8  |
| 136 | Waterloo Garbage & Yard Waste             | Android | April 15, 2019     | Lifestyle    | Regional waste disposal | 17  | 3.7 | Reduction, Tailoring, Suggestion, Similarity, Real-world feel                                                                                                                                                                                                                  | 6  |
| 137 | Wespack Client                            | iOS     | Feb 14, 2018       | Business     | Commercial WM           | 0   | 0   | Reduction, Personalization, Suggestion                                                                                                                                                                                                                                         | 4  |
| 138 | What Goes Where                           | iOS     | May 29, 2019       | Reference    | Regional waste disposal | 48  | 4.7 | Reduction, Personalization, Reminders, Social facilitation                                                                                                                                                                                                                     | 5  |
| 139 | Whitby Waste Buddy                        | Android | August 1, 2019     | Productivity | Regional waste disposal | 721 | 4.8 | Reduction, Simulation, Rehearsal, Praise, Rewards, Reminders, Similarity, Authority, Social facilitation, Cooperation                                                                                                                                                          | 11 |
| 140 | Whitey Services                           | Android | February 5, 2018   | Business     | Commercial WM           | 0   | 0   | Reduction, Tailoring, Personalization, Reminders, Suggestion, Trustworthiness, Real-world feel, Verifiability, Social facilitation                                                                                                                                             | 9  |
| 141 | WM CartWise                               | iOS     | Jun 6, 2019        | Reference    | Regional waste disposal | 15  | 3.3 | Reduction, Tunneling, Praise, Rewards, Suggestion, Real-world feel, Social facilitation                                                                                                                                                                                        | 7  |
| 142 | WMSBS                                     | Android | August 14, 2019    | Business     | Commercial WM           | 6   | 4.3 | Reduction, Personalization, Reminders, Suggestion                                                                                                                                                                                                                              | 5  |
| 143 | WRE                                       | iOS     | Oct 12, 2017       | Utilities    | AI aided waste sorting  | 0   | 0   | Reduction, Tunneling, Simulation, Rewards, Suggestion, Social facilitation                                                                                                                                                                                                     | 7  |
| 144 | Yo-Waste                                  | Android | July 31, 2019      | Business     | Waste collection        | 0   | 0   | Reduction, Personalization, Praise, Rewards, Reminders, Similarity, Liking, Surface credibility, Social facilitation, Cooperation                                                                                                                                              | 11 |

|     |                            |         |                   |              |                   |     |     |                                                                                                |   |
|-----|----------------------------|---------|-------------------|--------------|-------------------|-----|-----|------------------------------------------------------------------------------------------------|---|
| 145 | YWaste - Reduce food waste | Android | September 8, 2019 | Food & Drink | Food WM           | 125 | 3   | Reduction, Rewards, Social comparison                                                          | 4 |
| 146 | Zero Waste Objective       | Android | August 27, 2017   | Lifestyle    | Personal tracking | 70  | 3.8 | Reduction, Tunneling, Suggestion, Real-world feel, Verifiability, Social facilitation          | 6 |
| 147 | Zero-Waste - Avoid waste!  | Android | November 10, 2019 | Lifestyle    | Personal tracking | 27  | 4.3 | Reduction, Personalization, Reminders, Surface credibility, Verifiability, Social facilitation | 7 |
| 148 | ZeroWasteHeroApp           | Android | February 5, 2019  | Lifestyle    | Personal tracking | 19  | 4.6 | Personalization, Praise, Reminders, Suggestion, Cooperation                                    |   |
